# Supplementary material
Source: MDPI journal article supplement (https://www.mdpi.com/2076-3298/8/8/79)

**Figure S2.** Teratological forms observed for *Achnantheidium minutissimum*, *Cocconeis euglypta*, *Cymbopleura yateana*, *Fistulifera saprophila*, *Gomphonema* spp., *Meridion circulare*, *Navicula* spp., *Navicula tripunctata*, *Nitzschia acidoclinata*, *Nitzschia supralitorea*, *Stauroneis reichardtii*, *Staurosira venter*, Birafidea.

*Achnantheidium minutissimum*

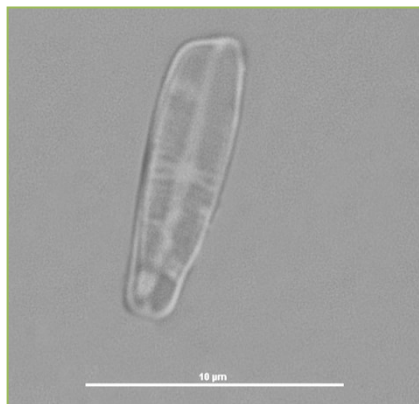

*Achnantheidium minutissimum*

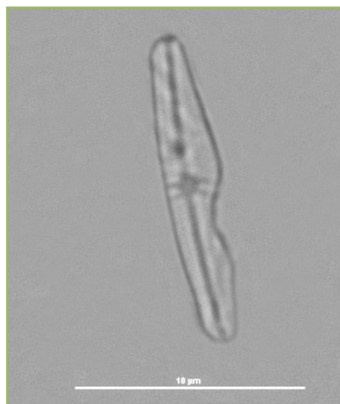

*Cocconeis euglypta*

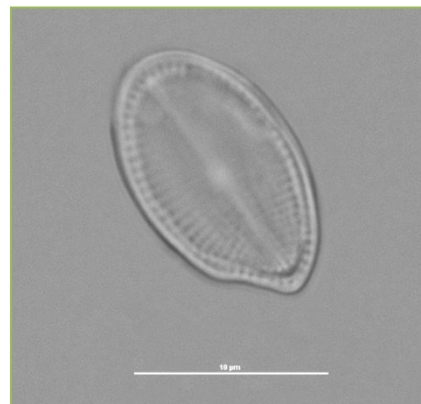

*Cocconeis euglypta*

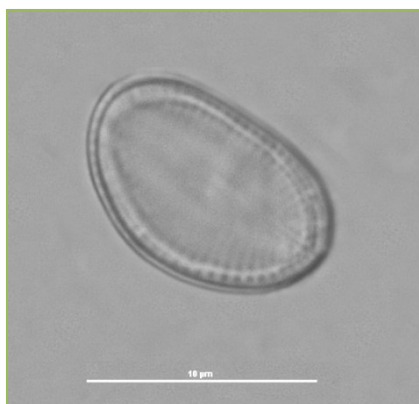

*Cymbopleura yateana*

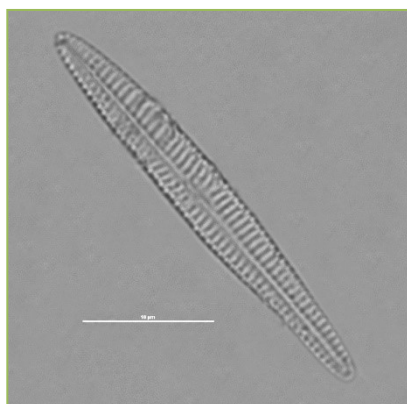

*Fistulifera saprophila*

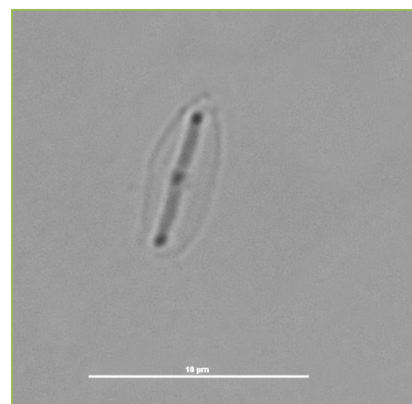

*Gomphonema* sp.1

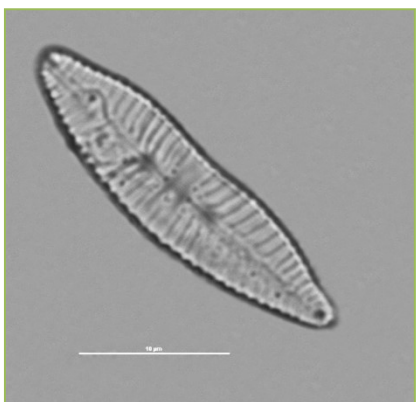

*Gomphonema* sp.2

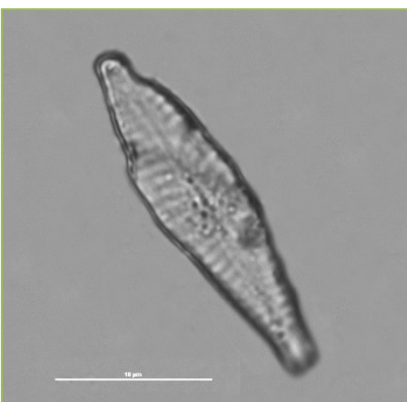

*Gomphonema* sp.3

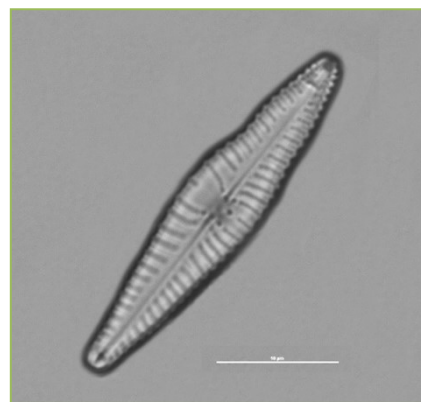

*Meridion circulare*

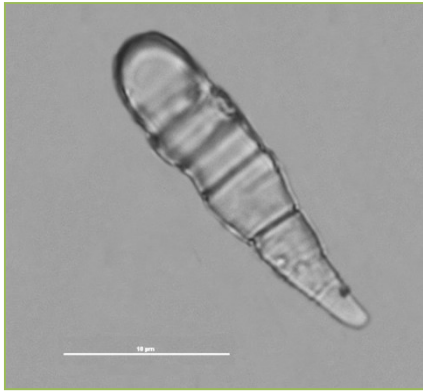

*Navicula sp.1*

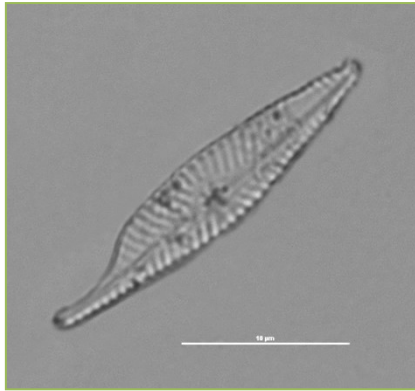

*Navicula sp.1*

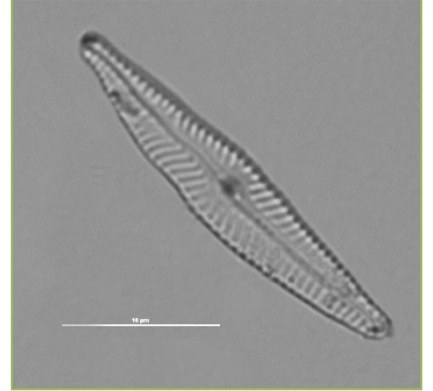

*Navicula sp.2*

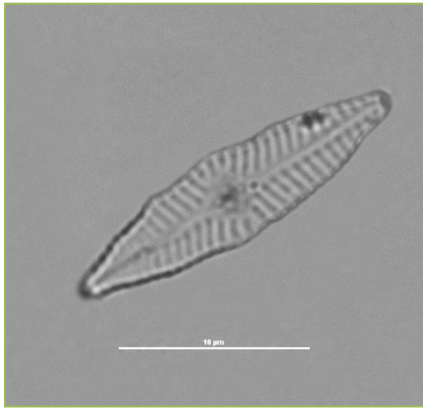

*Navicula sp.2*

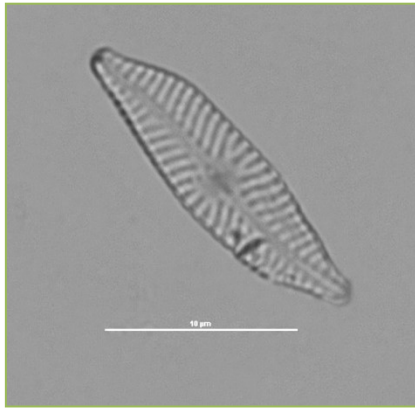

*Navicula tripunctata*

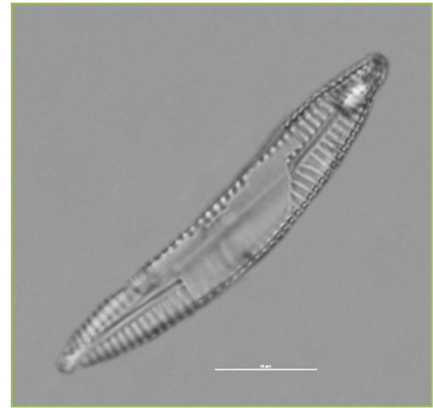

*Nitzschia acidoclinata*

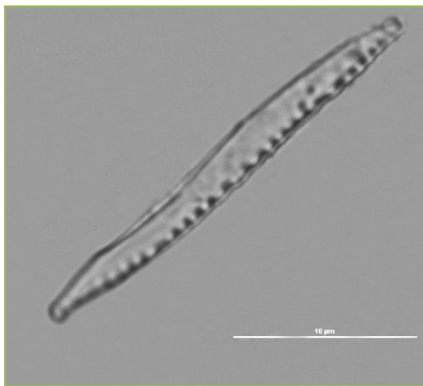

*Nitzschia acidoclinata*

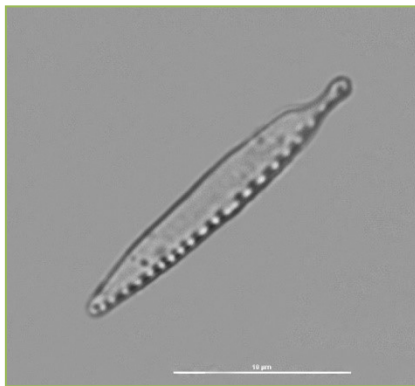

*Nitzschia supralitorea*

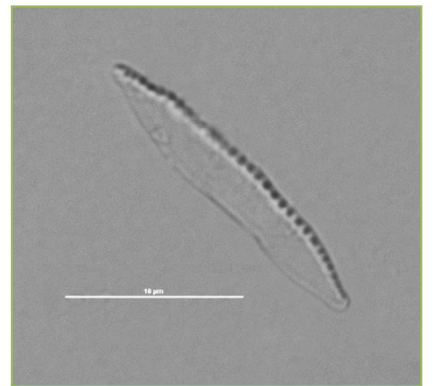

*Stauroneis reichardtii*

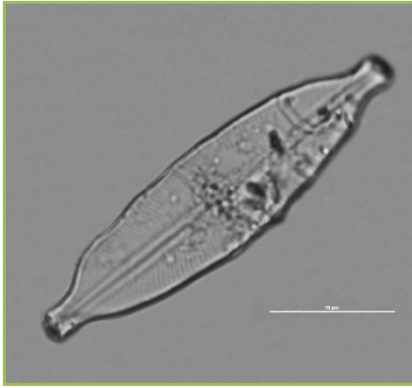

*Stauroneis reichardtii*

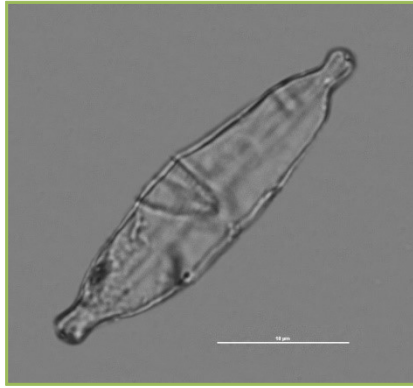

*Staurosira venter*

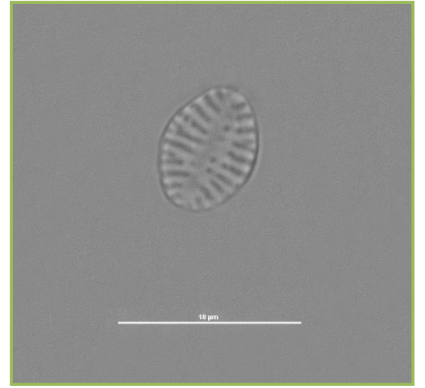

*Staurosira venter*

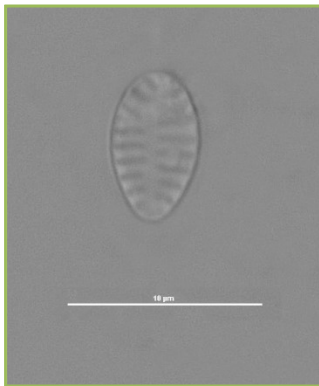

Birafidea

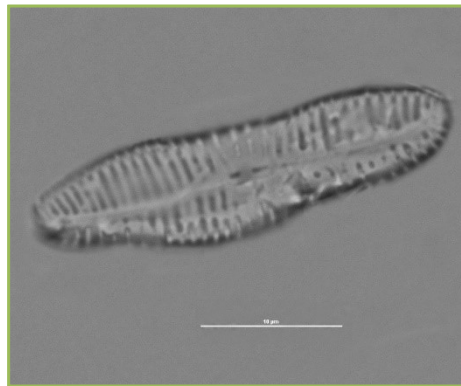

Supplement: s1 [file s1]
