# Supplementary material
Source: MDPI journal article supplement (https://www.mdpi.com/2076-3298/8/8/79)

**Figure S1.** Illustrations of the 111 species of diatoms recognized in the Pilato and Palazzo Borghese lakes. All bars correspond to a length of 10  $\mu\text{m}$ .

*Achnanthes coarctata*

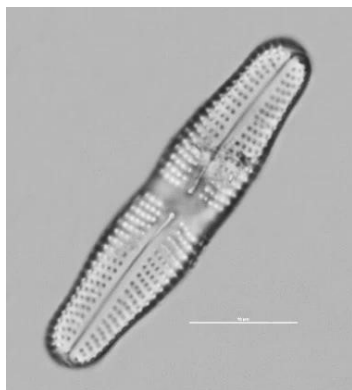

*Achnanthidium lineare*

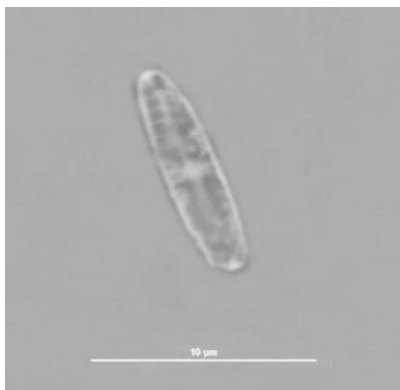

*Achnanthidium minutissimum*

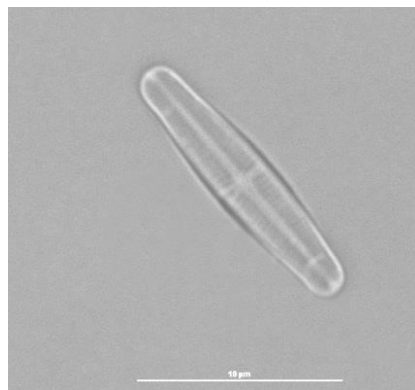

*Amphora inariensis*

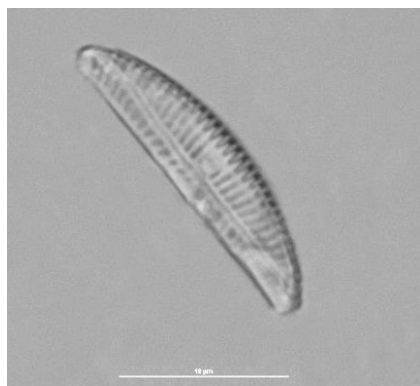

*Amphora meridionalis*

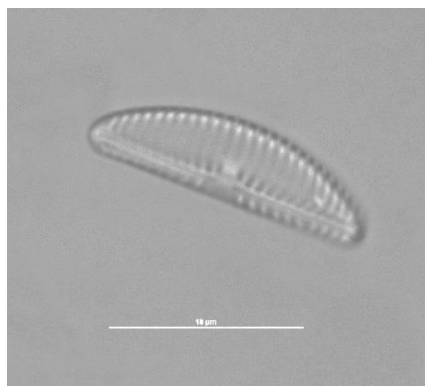

*Amphora ovalis*

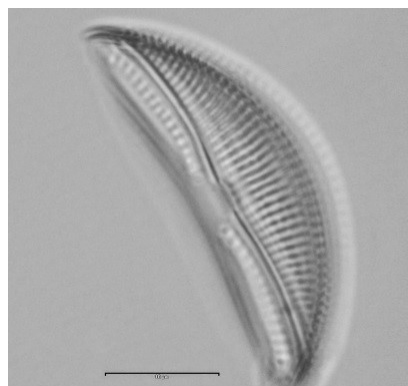

*Aulacoseira granulata*

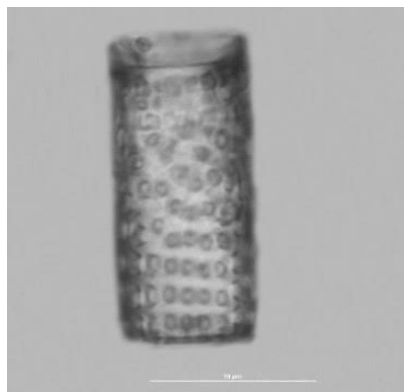

*Aulacoseira granulata* var. *angustissima*

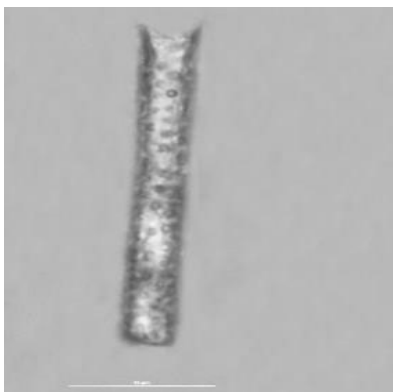

*Caloneis silicula*

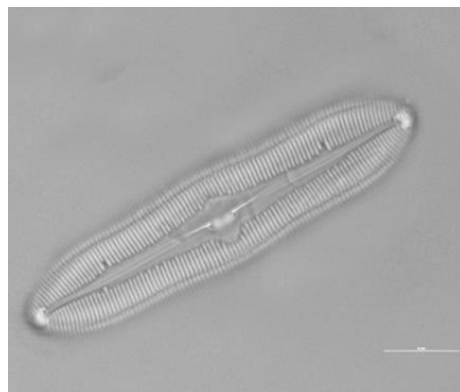

*Cocconeis euglypta*

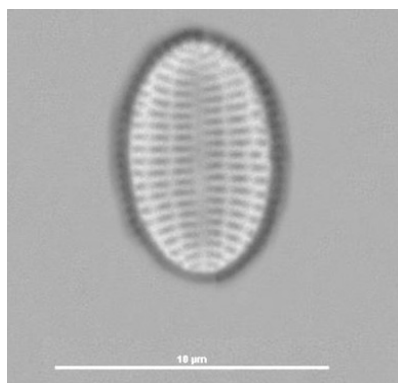

*Cocconeis euglyptoides*

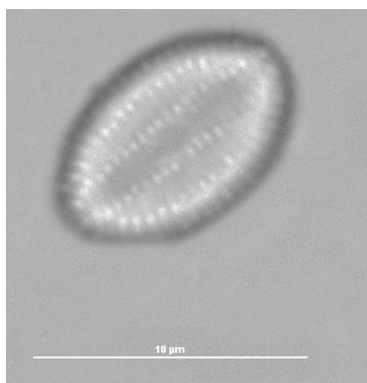

*Cocconeis pediculus*

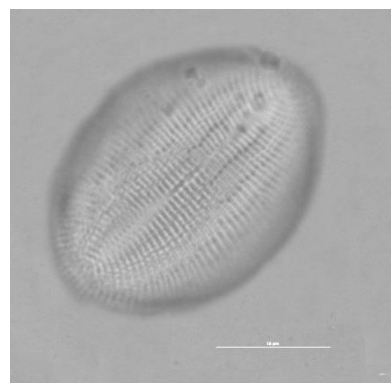

*Cocconeis euglypta*

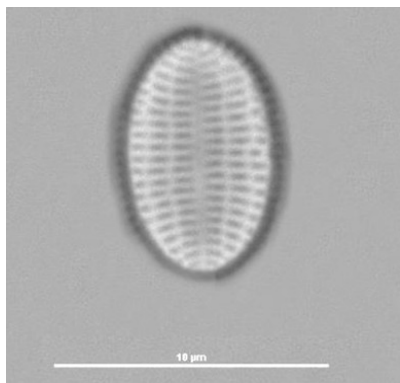

*Cocconeis euglyptoides*

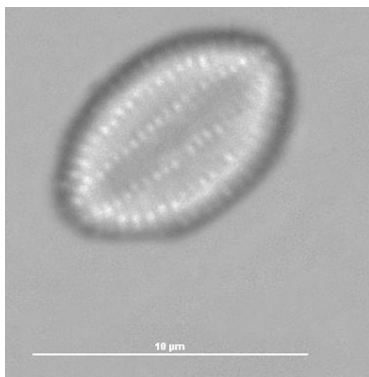

*Cocconeis pediculus*

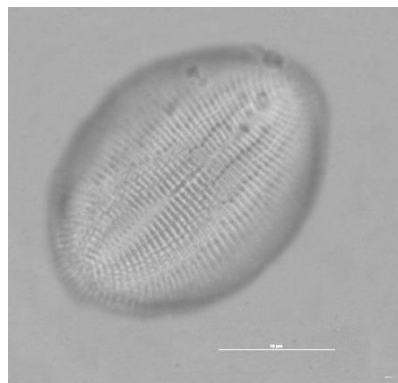

*Craticula ambigua*

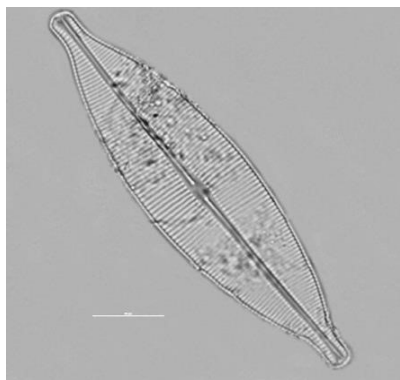

*Craticula molestiformis*

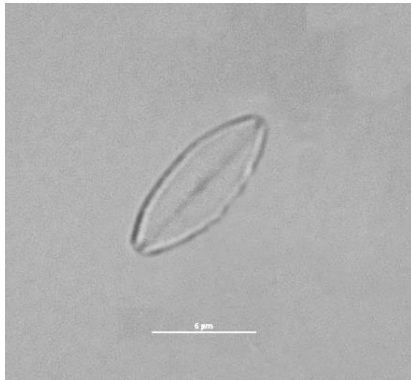

*Cyclotella intermedia*

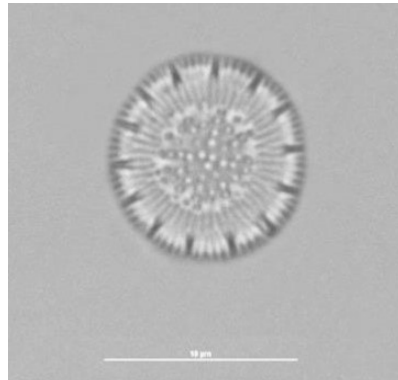

*Cyclotella meneghiniana*

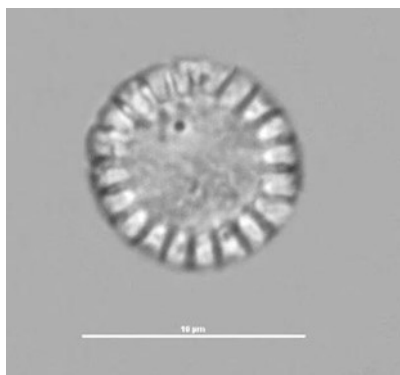

*Cymbella excisa*

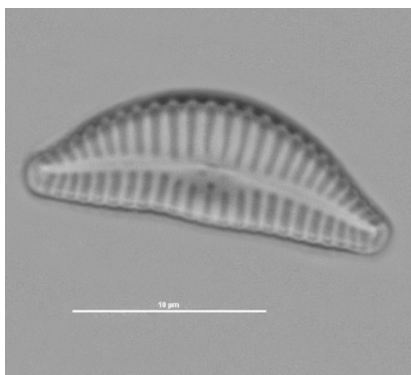

*Cymbella excisa* var. *procera*

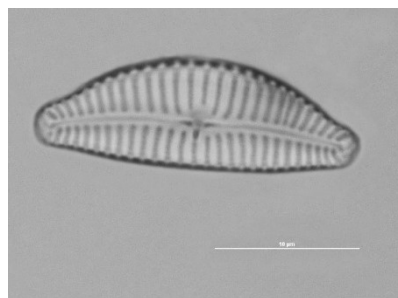

*Cymbella parva*

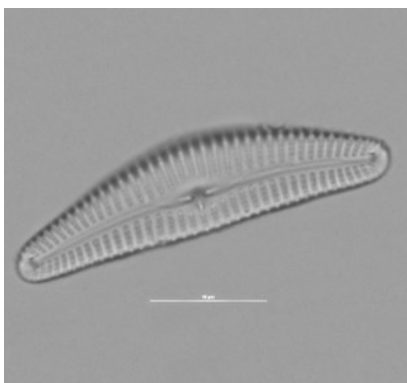

*Cymbella perparva*

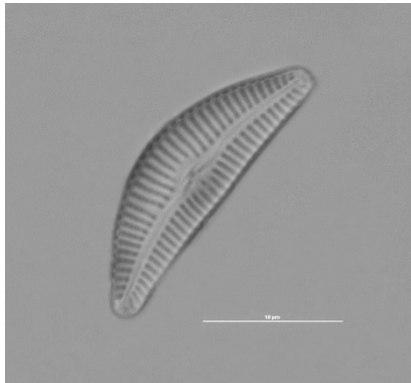

*Cymbella vulgata* var. *plitvicensis*

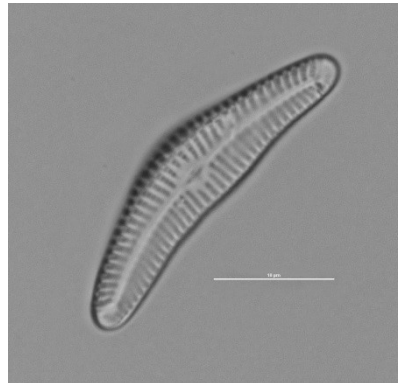

*Cymbopleura yateana*

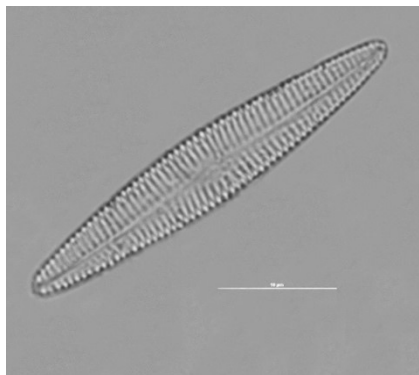

*Denticula tenuis*

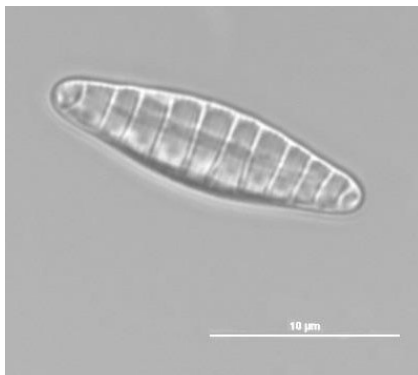

*Diadesmis contenta*

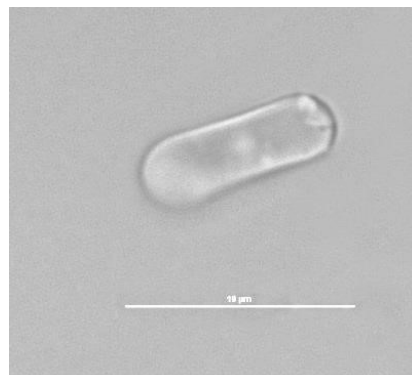

*Diadesmis perpusilla*

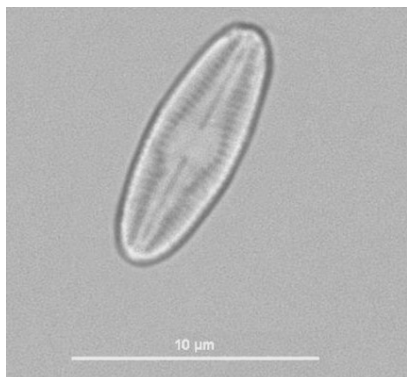

*Diatoma moniliformis*

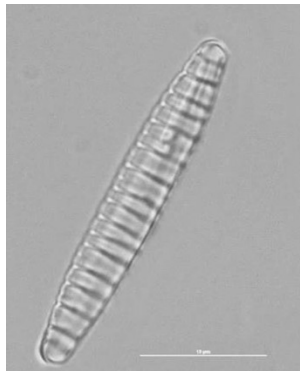

*Diploneis krammerii*

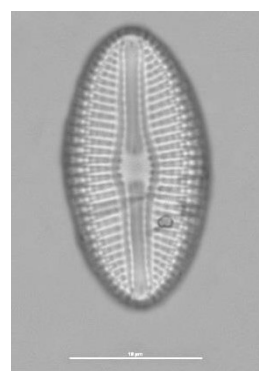

*Diploneis oculata*

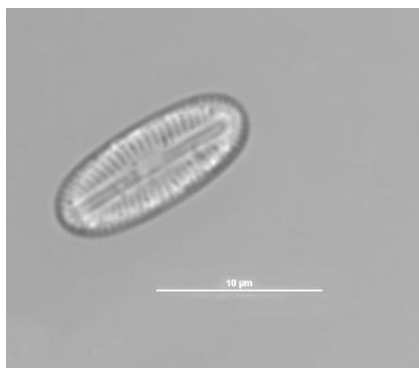

*Encyonema auerswaldii*

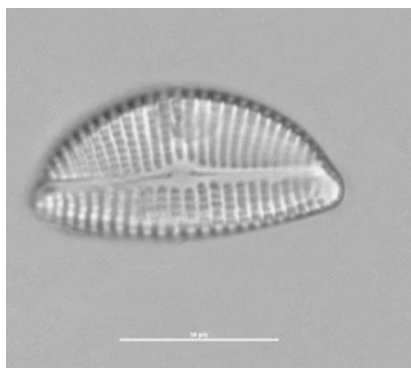

*Encyonema lange-bertalotii*

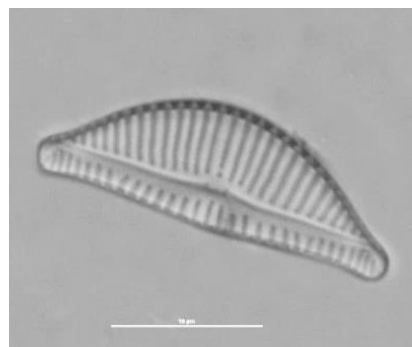

*Encyonema minutum*

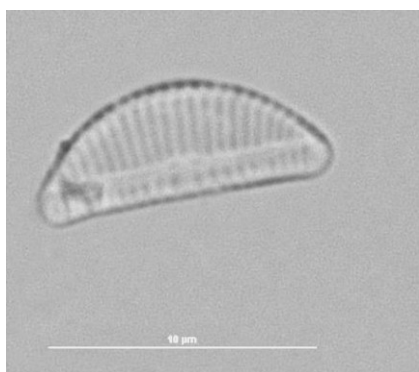

*Encyonema ventricosum*

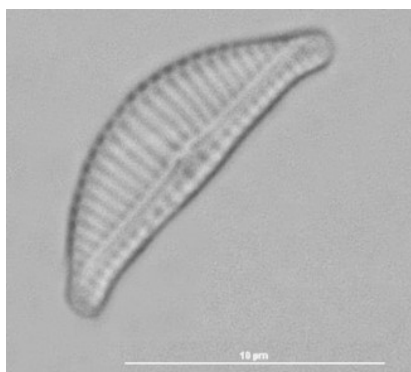

*Epithemia adnata*

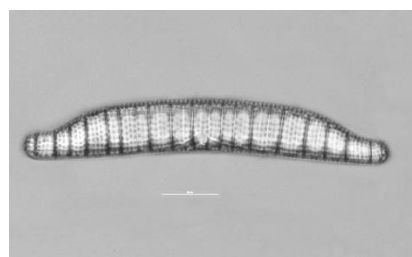

*Epithemia sorex*

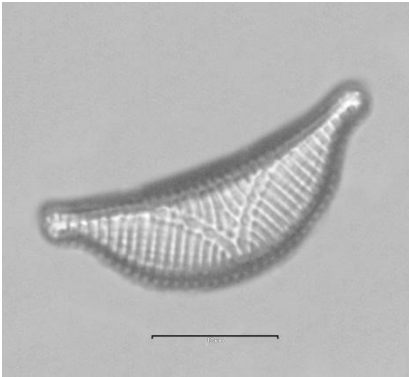

*Eucocconeis laevis*

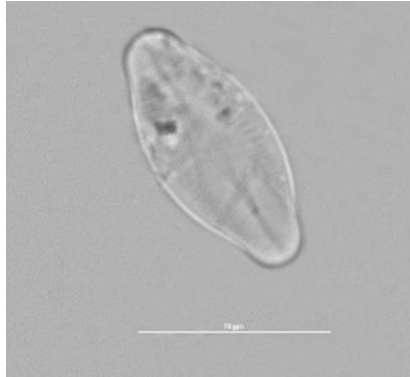

*Eunotia arcus*

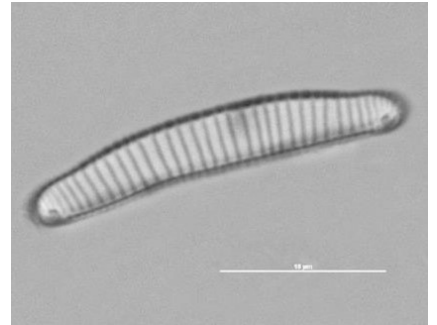

*Eunotia bilunaris*

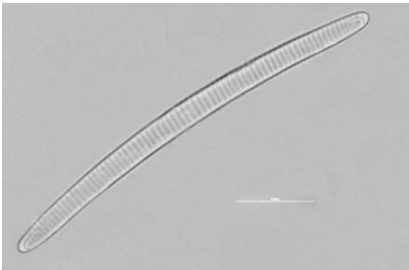

*Eunotia minor*

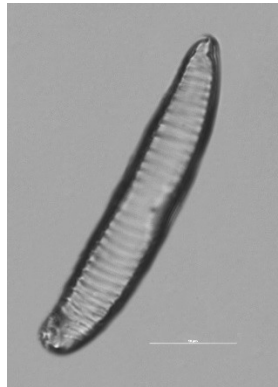

*Fallacia insociabilis*

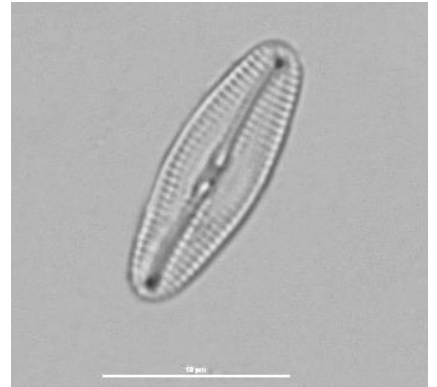

*Fistulifera saprophila*

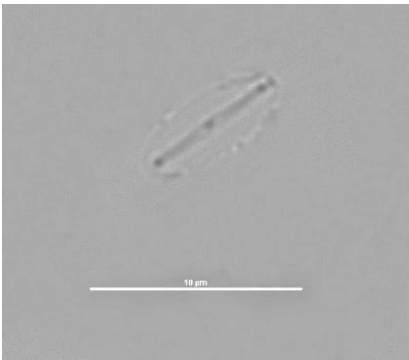

*Fragilaria acidoclinata*

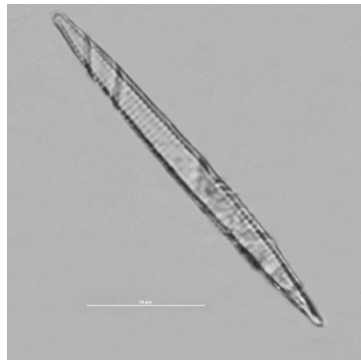

*Gomphonema angustatum*

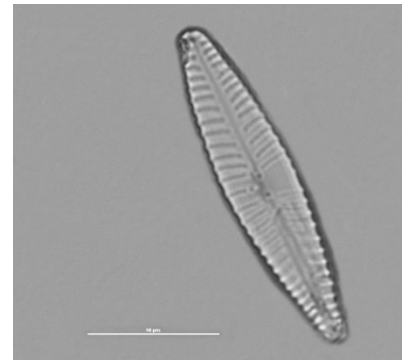

*Gomphonema cuneolus*

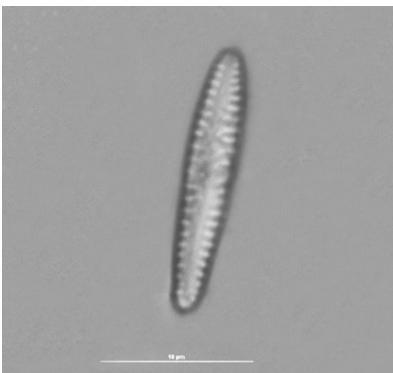

*Gomphonema cybelliclinum*

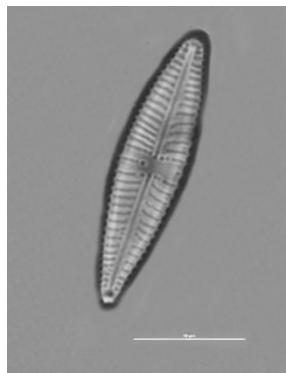

*Gomphonema drutelingense*

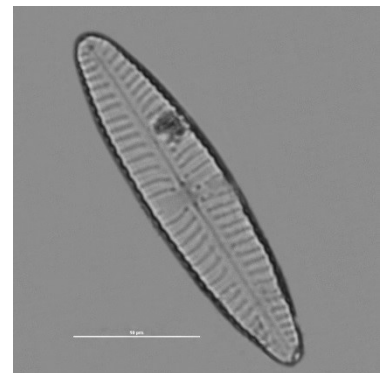

*Gomphonema longilineare*

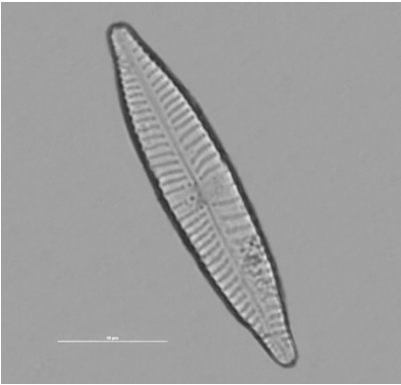

*Gomphonema micropus*

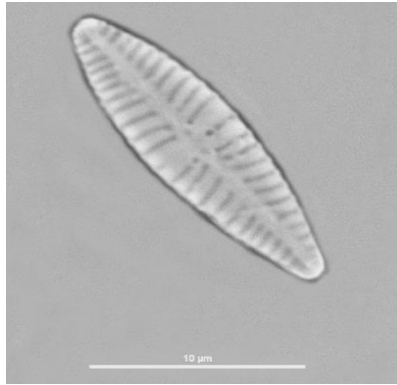

*Gomphonema minutum*

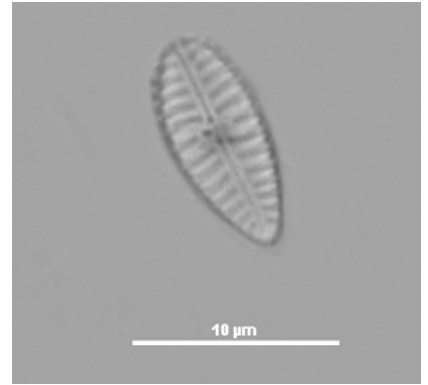

*Gomphonema olivaceum*

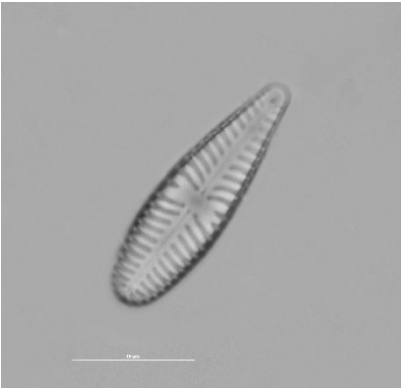

*Gomphonema pumilum*

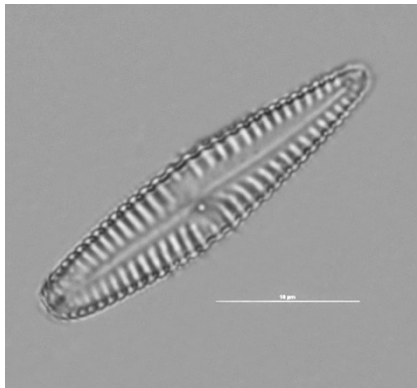

*Gomphonema rosenstockianum*

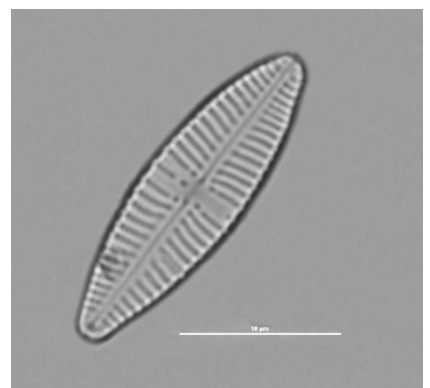

*Gomphonema sarcophagus*

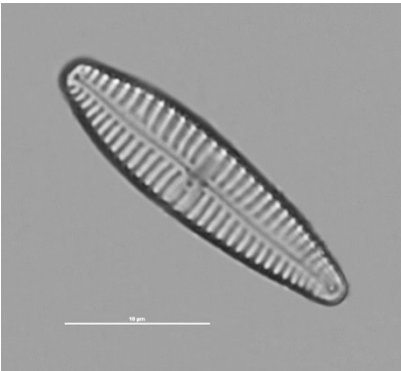

*Gomphonema tergestinum*

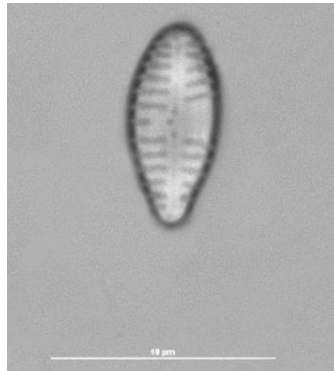

*Gyrosigma attenuatum*

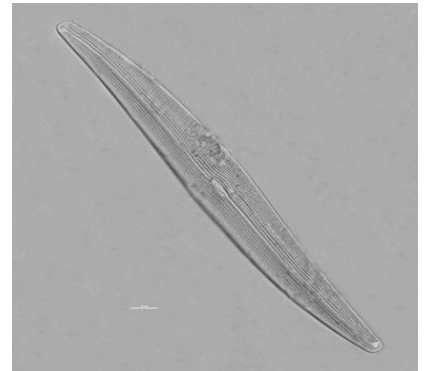

*Gyrosigma sciotense*

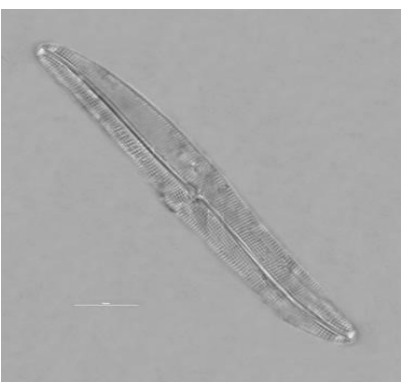

*Hantzschia abundans*

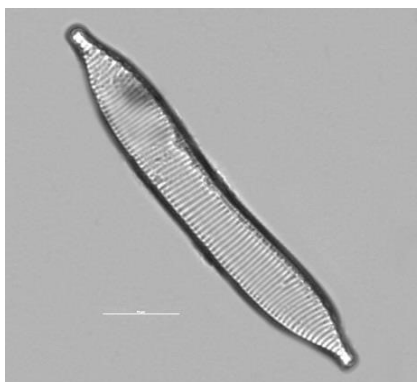

*Hantzschia amphioxys*

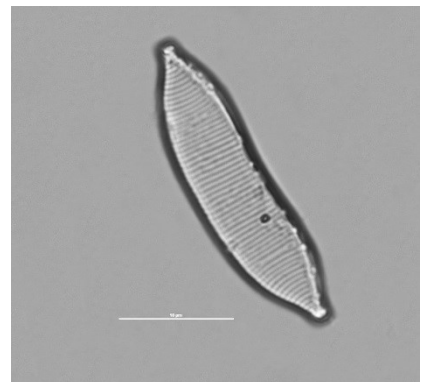

*Hantzschia calcifuga*

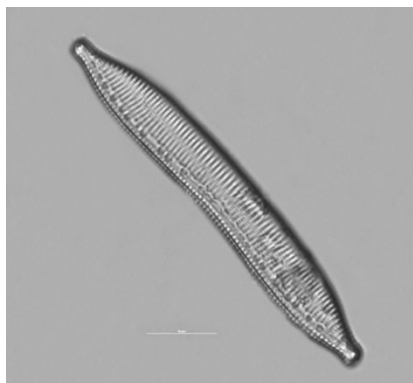

*Luticola binodis*

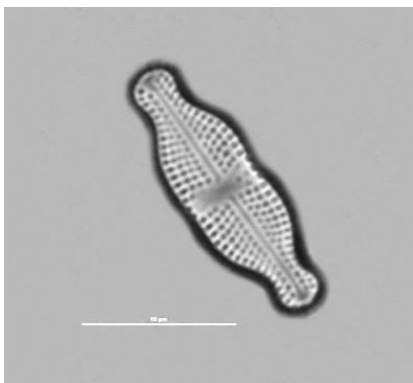

*Luticola mutica*

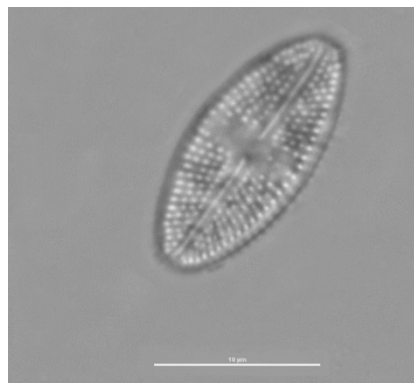

*Luticola nivalis*

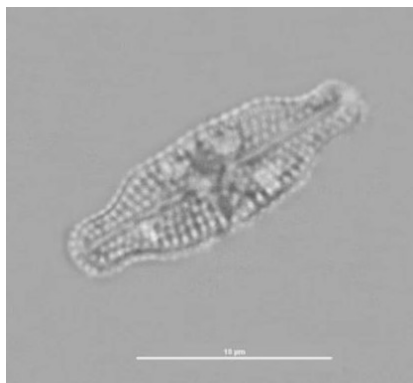

*Meridion circulare*

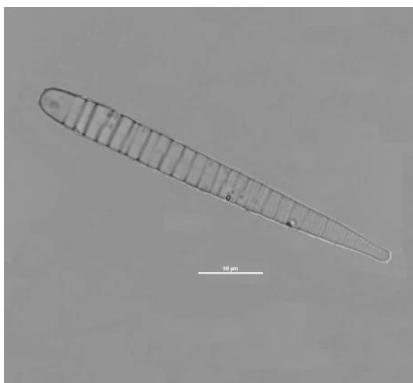

*Muelleria gibbula*

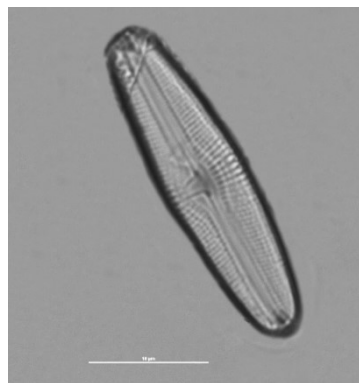

*Navicula capitatoradiata*

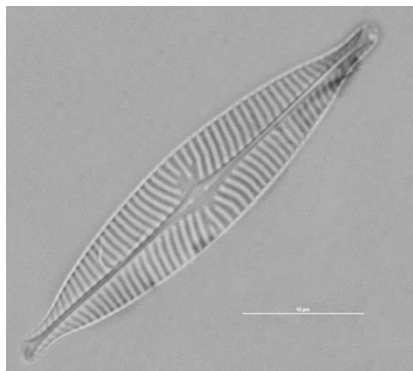

*Navicula cryptotenella*

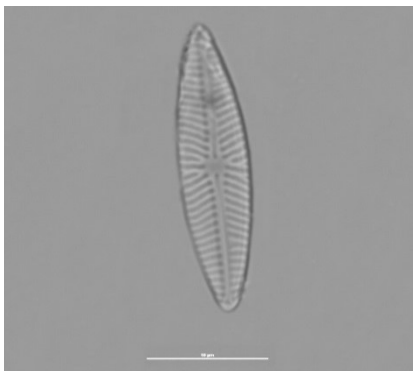

*Navicula densilineolata*

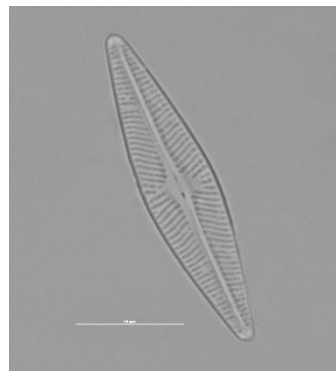

*Navicula gregaria*

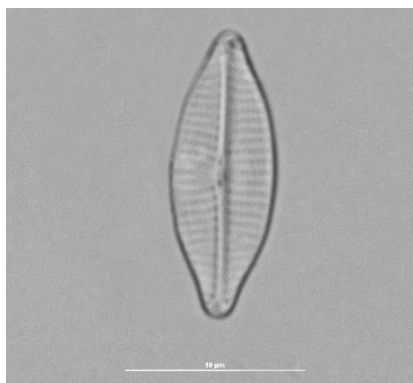

*Navicula lanceolata*

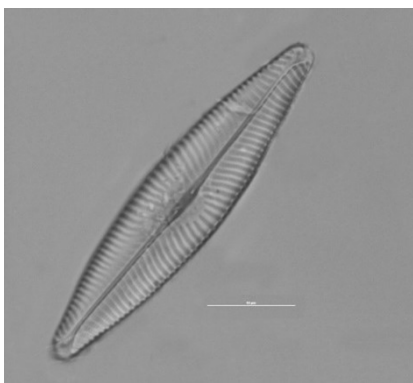

*Navicula lundii*

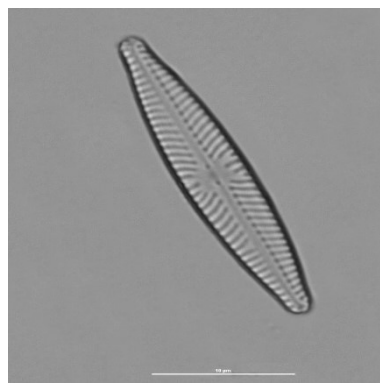



*Navicula microdigitoradiata*

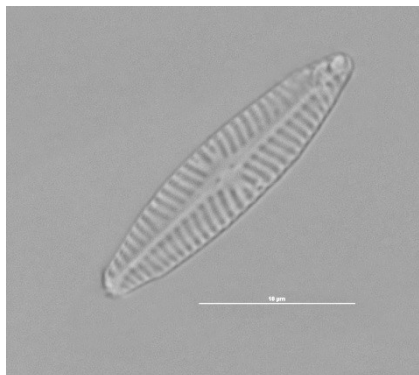

*Navicula reichardtiana*

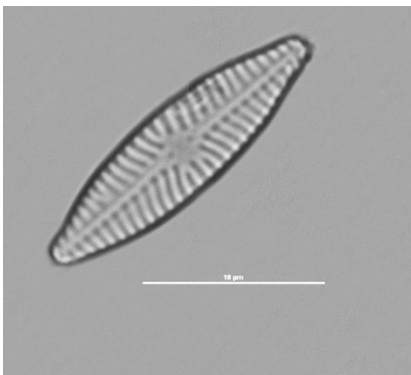

*Navicula tripunctata*

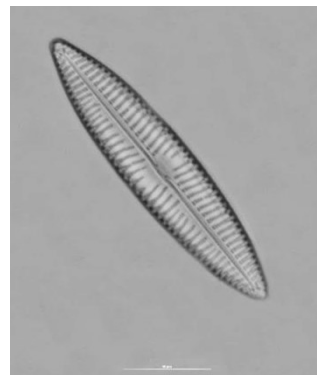

*Navicula trivialis*

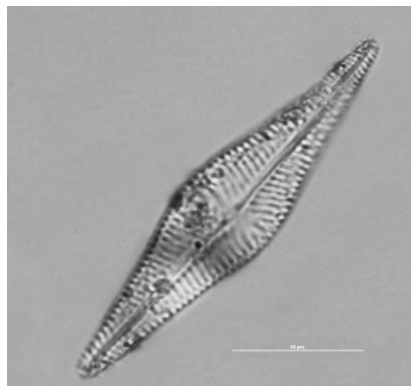

*Navicula wildii*

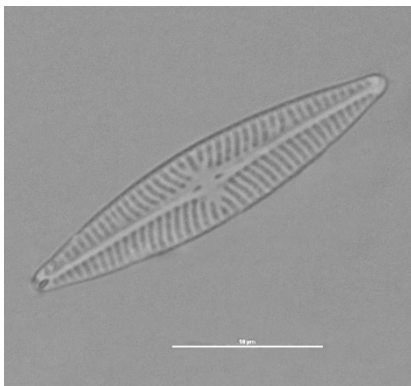

*Neidium bisulcatum*

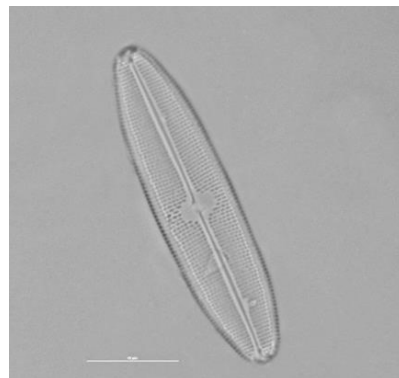

*Neidium longiceps*

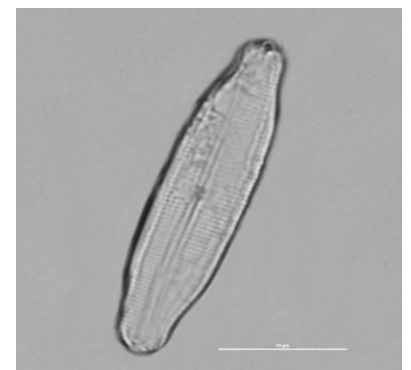

*Nitzschia acidoclinata*

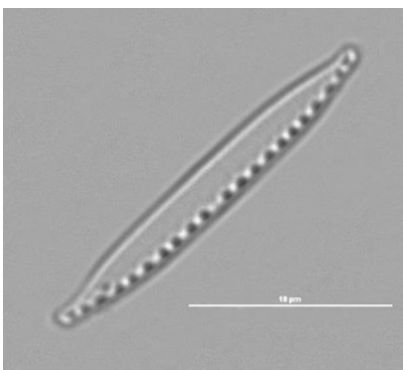

*Nitzschia angustata*

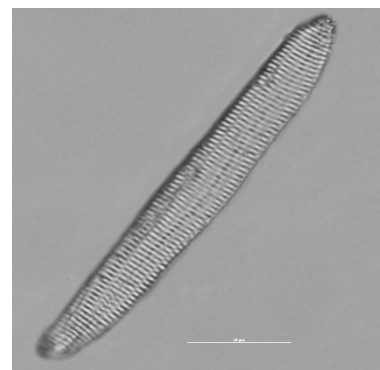

*Nitzschia clausii*

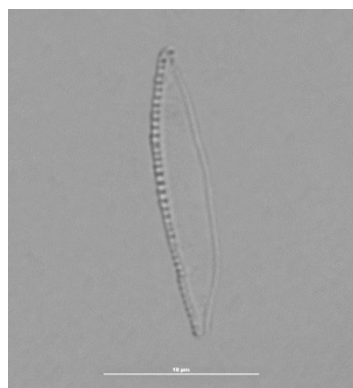

*Nitzschia dissipata*

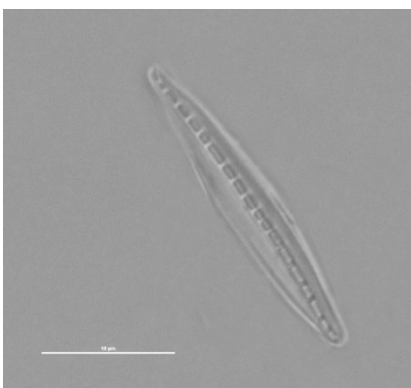

*Nitzschia inconspicua*

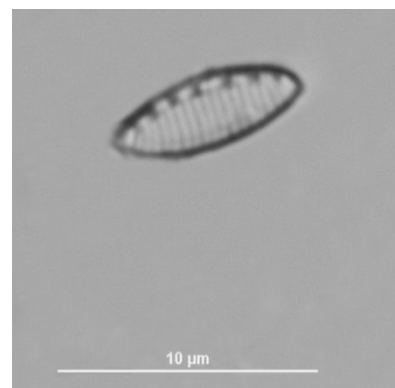

*Nitzschia linearis*

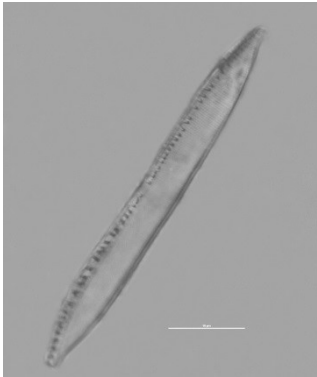

*Nitzschia pusilla*

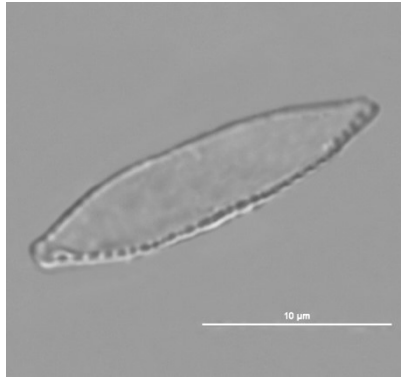

*Nitzschia subtilis*

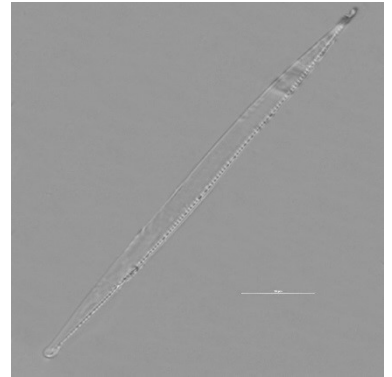

*Nitzschia supralitorea*

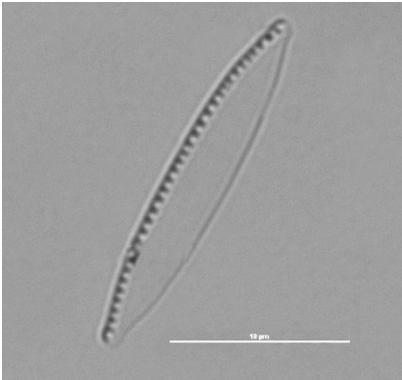

*Nitzschia sociabilis*

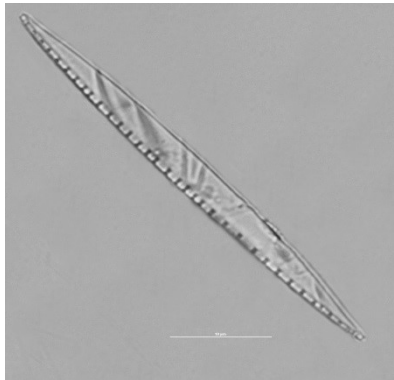

*Pinnularia borealis*

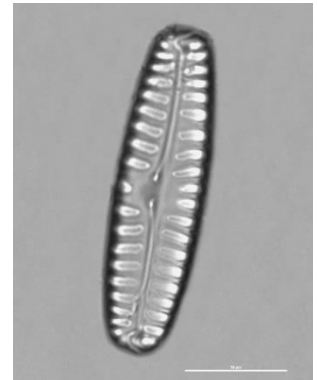

*Pinularia grunowii*

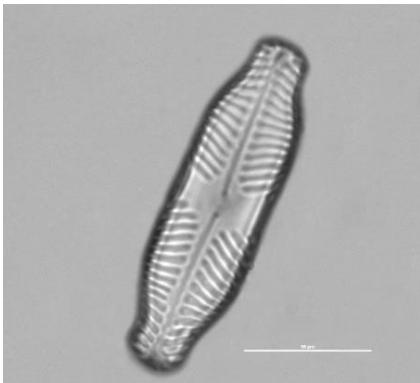

*Pinnularia microstauron var. angusta*

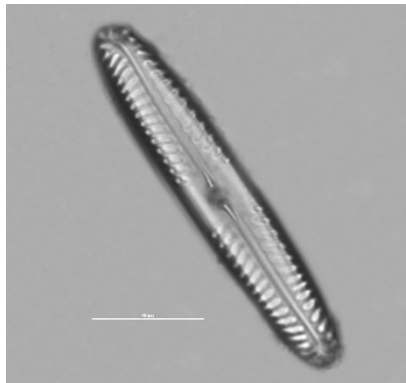

*Pinnularia obscura*

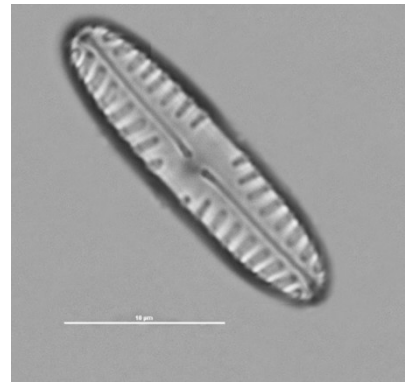

*Pinnularia rupestris*

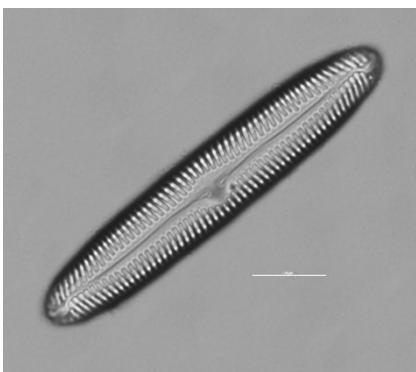

*Pinnularia schoenfelderi*

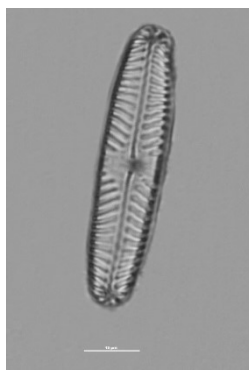

*Placoneis placentula*

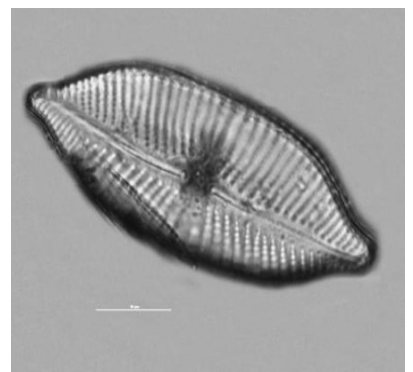



*Planothidium frequentissimum*

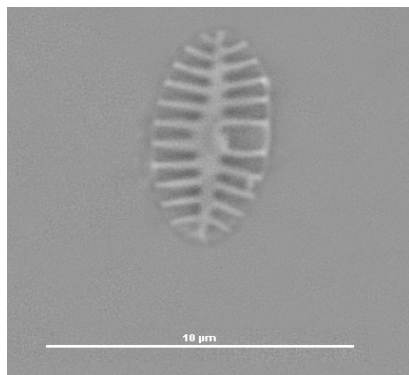

*Planothidium joursacense*

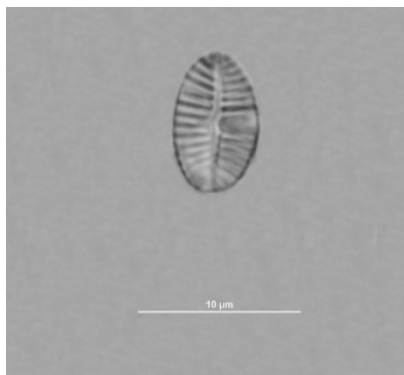

*Planothidium lanceolatum*

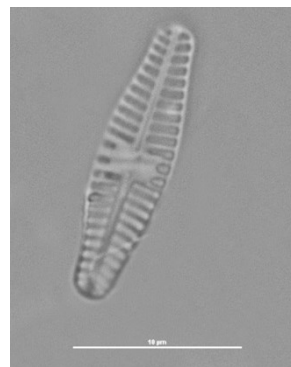

*Psammothidium daonense*

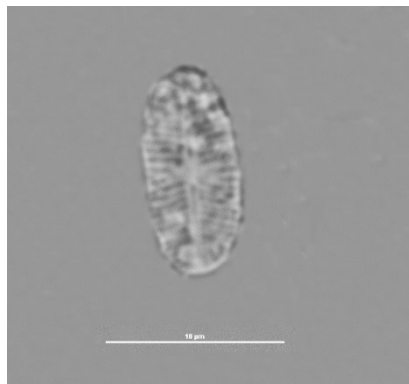

*Pseudostaurosira robusta*

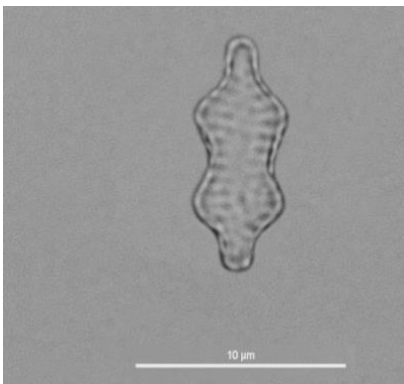

*Reimeria sinuata*

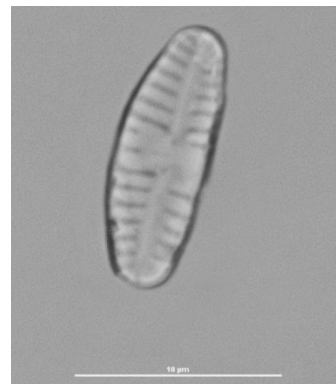

*Rhoicosphenia abbreviata*

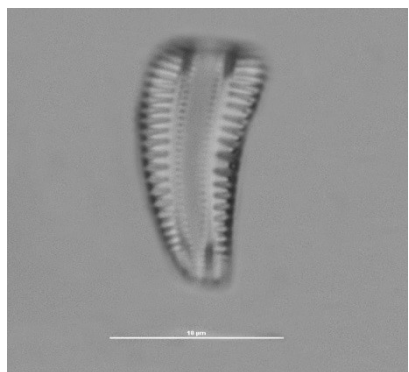

*Sellaphora atomoides*

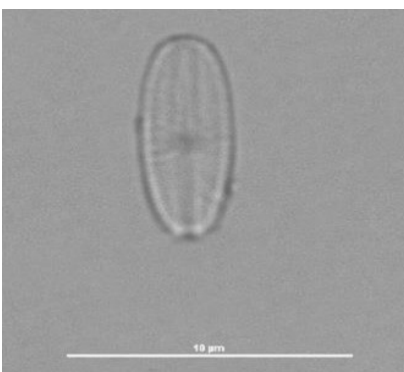

*Sellaphora pseudopupula*

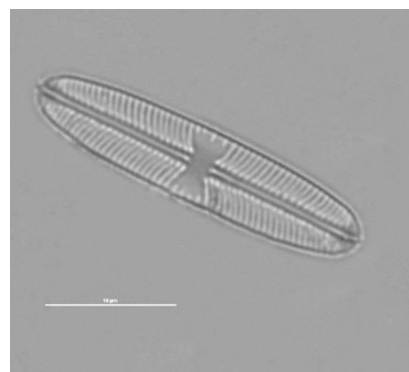

*Sellaphora saugerresii*

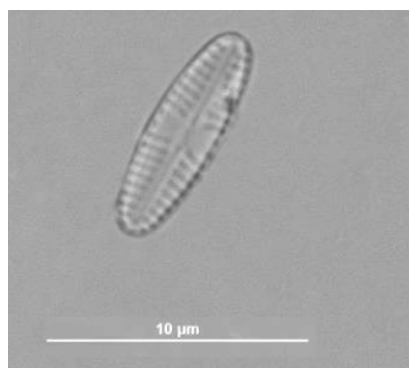

*Stauroneis gracilis*

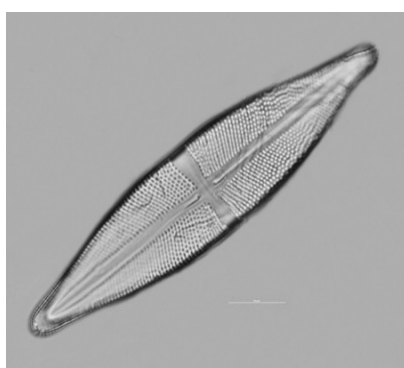

*Stauroneis reichardtii*

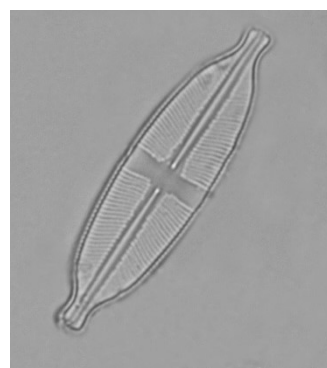

*Staurosira contruens*

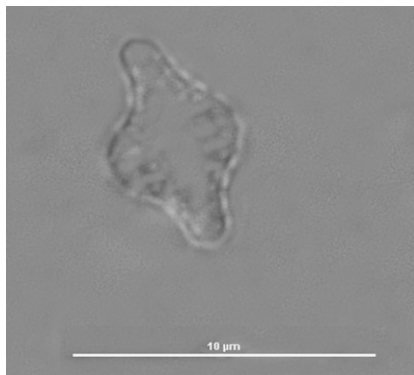

*Staurosira venter*

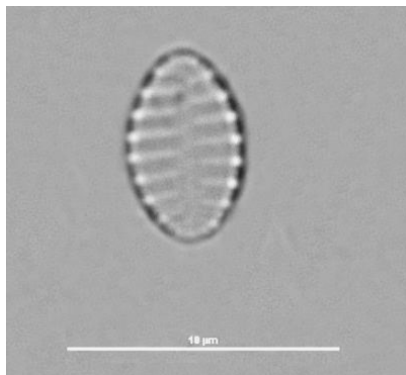

*Staurosirella lapponica*

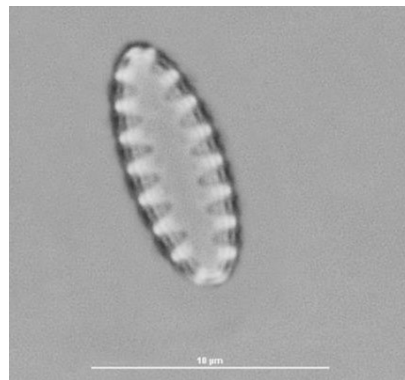

*Tryblionella apiculata*

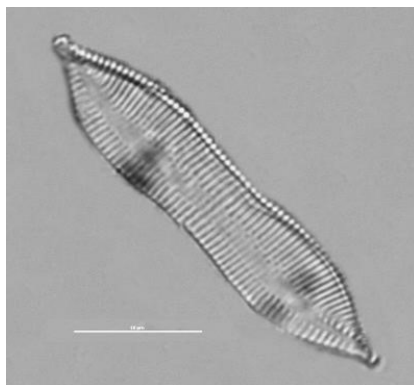

*Ulnaria acus*

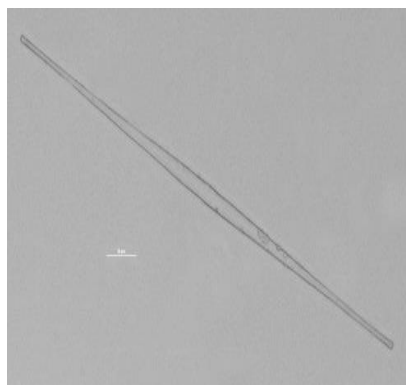

*Ulnaria ulna*

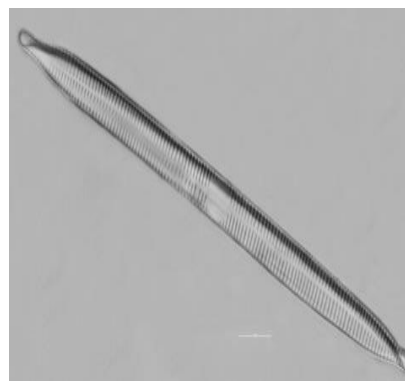

Supplement: s1 [file s1]
