# Supplementary material
Source: MDPI journal article supplement (https://www.mdpi.com/2076-3298/8/8/79)
Supplement: s1 [file s1]

**Table S1.** Ecological requirements of diatoms species (according to Van Dam et al. [38]) recognized in the Pilato and Palazzo Borghese lakes. Moisture aerophily: (-) Unknown; (1) Aquatic; (2) Occasionally aerophilic; (3) Aquatic to aerophilic; (4) Aerophilic; (5) Terrestrial. pH requirements: (-) Unknown; (1) Acidobiontic pH<5.5; (2) Acidophilic pH<7; (3) Neutrophilic pH=7; (4) Alkaliphilic pH>7; (5) Alkalobiontica pH exclusively>7; (6) Euryionic. Oxygen: (-) Unknown; (1) Polyoxybiontic 100% sat.; (2) Oxybiontic 75% sat.; (3) Moderate O<sub>2</sub> >50% sat.; (4) Low O<sub>2</sub> ≈30% sat.; (5) Very low O<sub>2</sub> <10% sat. Salinity: (-) Unknown; (1) Halophobe; (2) Oligohalobus; (3) Halophilic; (4) Mesohalobus; (5) Saumatre à marin; (6) Marin à saumatre; (7) Marin. Trophic status: (-) Unknown; (1) Oligotrophic; (2) Oligo-Mesotrophic; (3) Mesotrophic; (4) Meso-Eutrophic; (5) Eutrophic; (6) Hypereutrophic; (7) Indifferent.

| Taxon                                                 | Pilato Lake | Palazzo Borghese Lake | Moisture aerophily | pH requirements | Oxygen requirements | Salinity | Saprobity | Trophic state |
|-------------------------------------------------------|-------------|-----------------------|--------------------|-----------------|---------------------|----------|-----------|---------------|
| <i>Achnanthes coarctata</i>                           | X           | X                     | 5                  | 3               | 1                   | 1        | 1         | 2             |
| <i>Achnanthidium lineare</i>                          | X           |                       | -                  | 3               | -                   | -        | -         | -             |
| <i>Achnanthidium minutissimum</i>                     | X           | X                     | 3                  | 3               | 1                   | 2        | 2         | 7             |
| <i>Amphora inariensis</i>                             | X           | X                     | -                  | -               | -                   | 2        | -         | 1             |
| <i>Amphora meridionalis</i>                           | X           |                       | -                  | -               | -                   | -        | -         | -             |
| <i>Amphora ovalis</i>                                 | X           |                       | 1                  | 4               | 2                   | 2        | 2         | 5             |
| <i>Aulacoseira granulata</i>                          | X           | X                     | 1                  | 4               | 3                   | 2        | 2         | 5             |
| <i>Aulacoseira granulata</i> var. <i>angustissima</i> | X           | X                     | 1                  | 4               | 3                   | 2        | 2         | 5             |
| <i>Caloneis silicula</i>                              | X           |                       | 1                  | 4               | 2                   | 2        | 1         | 4             |
| <i>Cocconeis euglypta</i>                             | X           |                       | 2                  | 4               | 3                   | 2        | 2         | 5             |
| <i>Cocconeis euglyptoides</i>                         | X           |                       | -                  | -               | -                   | -        | -         | -             |
| <i>Cocconeis pediculus</i>                            | X           |                       | 1                  | 4               | 2                   | 3        | 2         | 5             |
| <i>Craticula ambigua</i>                              |             | X                     | -                  | -               | -                   | 2        | -         | 5             |
| <i>Craticula molestiformis</i>                        | X           | X                     | 3                  | 4               | 4                   | 2        | 4         | 5             |
| <i>Cyclotella intermedia</i>                          | X           | X                     | -                  | -               | -                   | -        | -         | -             |
| <i>Cyclotella meneghiniana</i>                        | X           |                       | 2                  | 4               | 5                   | 3        | 4         | 5             |
| <i>Cymbella excisa</i>                                | X           |                       | 2                  | 4               | 1                   | 2        | 2         | 5             |
| <i>Cymbella excisa</i> var. <i>procera</i>            | X           |                       | 2                  | -               | 1                   | 2        | 2         | 5             |
| <i>Cymbella parva</i>                                 | X           | X                     | -                  | -               | -                   | -        | -         | -             |
| <i>Cymbella perparva</i>                              | X           |                       | -                  | 4               | -                   | -        | -         | -             |
| <i>Cymbella vulgata</i>                               | X           |                       | -                  | -               | -                   | -        | -         | -             |
| <i>Cymbella</i> var. <i>plitvicensis</i>              | X           |                       | -                  | -               | -                   | -        | -         | -             |
| <i>Cymboplectura yateana</i>                          | X           |                       | -                  | -               | -                   | -        | -         | -             |
| <i>Denticula tenuis</i>                               | X           |                       | 3                  | 4               | 1                   | 1        | 1         | 3             |
| <i>Diadensis contenta</i>                             | X           |                       | 4                  | 4               | 1                   | 2        | 2         | 7             |
| <i>Diadensis perpusilla</i>                           | X           |                       | 5                  | 3               | 1                   | 2        | 1         | 1             |
| <i>Diatoma moniliformis</i>                           | X           |                       |                    | 5               |                     | 4        |           | 5             |
| <i>Diploneis krammerii</i>                            | X           |                       | 4                  | 4               | 1                   | 2        | 1         | -             |
| <i>Diploneis oculata</i>                              | X           |                       | 3                  | 3               | -                   | 2        | 2         | -             |
| <i>Encyonema auerswaldi</i>                           | X           |                       | -                  | -               | -                   | -        | -         | -             |
| <i>Encyonema</i> langebertalotii                      | X           |                       | -                  | 3               | -                   | -        | -         | -             |
| <i>Encyonema minutum</i>                              | X           |                       | -                  | 3               | -                   | 2        | -         | -             |
| <i>Encyonema ventricosum</i>                          | X           |                       | -                  | 3               | -                   | -        | -         | -             |
| <i>Epithemia adnata</i>                               | X           |                       | 2                  | 5               | 2                   | 2        | 2         | 4             |
| <i>Epithemia sorex</i>                                | X           |                       | 2                  | 5               | 2                   | 2        | 2         | 5             |

| Taxon                              | Pilato<br>Lake | Palazzo<br>Borghese<br>Lake | Moisture<br>aerophily | pH<br>requirements | Oxygen<br>requirements | Salinity | Saprobity | Trophic<br>state |
|------------------------------------|----------------|-----------------------------|-----------------------|--------------------|------------------------|----------|-----------|------------------|
| <i>Eucocconeis laevis</i>          | X              |                             | 3                     | 3                  | 1                      | 1        | 1         | 1                |
| <i>Eunotia arcus</i>               | X              |                             | 3                     | -                  | -                      | 1        | 1         | 2                |
| <i>Eunotia bilunaris</i>           | X              |                             | 3                     | -                  | 2                      | 2        | 2         | 7                |
| <i>Eunotia minor</i>               |                |                             | 4                     | -                  | 1                      | -        | 1         | -                |
| <i>Fallacia insociabilis</i>       | X              | X                           | 4                     | 3                  | 1                      | 1        | 1         | 3                |
| <i>Fistulifera saprophila</i>      |                | X                           | 3                     | 3                  | 4                      | 2        | 4         | 5                |
| <i>Fragilaria acidoclinata</i>     | X              |                             | -                     | 2                  | -                      | 1        | -         | -                |
| <i>Gomphonema angustatum</i>       |                | X                           | -                     | 3                  | -                      | 2        | -         | 4                |
| <i>Gomphonema cuneolus</i>         | X              |                             | -                     | -                  | -                      | -        | -         | -                |
| <i>Gomphonema cymbelliclinum</i>   |                | X                           | -                     | 4                  | -                      | -        | -         | -                |
| <i>Gomphonema drutelingense</i>    |                | X                           | -                     | -                  | -                      | -        | -         | -                |
| <i>Gomphonema longilineare</i>     |                | X                           | -                     | -                  | -                      | -        | -         | -                |
| <i>Gomphonema micropus</i>         | X              | X                           | 3                     | 4                  | 2                      | 2        | 2         | 5                |
| <i>Gomphonema minutum</i>          | X              | X                           | -                     | 3                  | -                      | 2        | 2         | 5                |
| <i>Gomphonema olivaceum</i>        | X              |                             | 1                     | -                  | 2                      | 2        | 2         | 5                |
| <i>Gomphonema pumilum</i>          | X              |                             | -                     | -                  | -                      | 2        | -         | 7                |
| <i>Gomphonema rosenstokianum</i>   |                | X                           | -                     | -                  | -                      | -        | -         | -                |
| <i>Gomphonema sarcophagus</i>      |                | X                           | 3                     | 4                  |                        | 2        | 2         | 3                |
| <i>Gomphonema tergestinum</i>      | X              | X                           | 3                     | 4                  | 1                      | 2        | 1         | 2                |
| <i>Gyrosigma attenuatum</i>        |                | X                           | 1                     | 5                  | 3                      | 2        | 2         | 5                |
| <i>Gyrosigma sciotense</i>         | X              |                             | -                     | 4                  | 1                      | 3        | 2         | 5                |
| <i>Hantzschia abundans</i>         | X              | X                           | 4                     | 3                  | 2                      | 2        | 3         | 7                |
| <i>Hantzschia amphioxys</i>        | X              | X                           | 4                     | 3                  | 2                      | 2        | 3         | 7                |
| <i>Hantzschia calcifuga</i>        |                | X                           | -                     | -                  | -                      | -        | -         | -                |
| <i>Luticola binodis</i>            |                | X                           | -                     | -                  | -                      | -        | -         | -                |
| <i>Luticola mutica</i>             | X              | X                           | 4                     | 3                  | 1                      | 3        | 3         | 5                |
| <i>Luticola nivalis</i>            | X              |                             | 4                     | 3                  | -                      | 3        | 2         | 5                |
| <i>Meridion circulare</i>          | X              | X                           | 1                     | 4                  | 2                      | 2        | 2         | 7                |
| <i>Muelleria gibbula</i>           |                | X                           | 5                     | 3                  | -                      | 2        | -         | -                |
| <i>Navicula capitatoradiata</i>    | X              |                             | 1                     | 4                  | 3                      | 2        | 3         | 5                |
| <i>Navicula cryptotenella</i>      | X              |                             | 2                     | 4                  | -                      | 2        | 2         | 7                |
| <i>Navicula densilineolata</i>     | X              |                             | -                     | 4                  | -                      | 1        | -         | 1                |
| <i>Navicula gregaria</i>           | X              |                             | 3                     | 4                  | 4                      | 3        | 3         | 5                |
| <i>Navicula lanceolata</i>         | X              |                             | 3                     | 4                  | 3                      | 3        | 3         | 5                |
| <i>Navicula lundi</i>              | X              | X                           | 3                     | 4                  | 2                      | 2        | 2         | 5                |
| <i>Navicula microdigitoradiata</i> | X              |                             | -                     | -                  | -                      | -        | -         | -                |
| <i>Navicula reichardtiana</i>      |                | X                           | -                     | 4                  | -                      | 2        | 3         | -                |
| <i>Navicula tripunctata</i>        | X              |                             | 3                     | 4                  | 2                      | 2        | 2         | 5                |
| <i>Navicula trivialis</i>          | X              |                             | 3                     | 4                  | 3                      | 3        | 3         | 5                |
| <i>Navicula wildii</i>             | X              | X                           | -                     | 4                  | -                      | 2        | -         | 2                |
| <i>Neidium bisulcatum</i>          | X              | X                           | 3                     | 3                  | 1                      | 1        | 1         | 1                |
| <i>Neidium longiceps</i>           |                | X                           | 3                     | 2                  | 1                      | 1        | 1         | 1                |
| <i>Nitzschia acidoclinata</i>      |                | X                           | 3                     | 3                  | 1                      | 1        | 2         | 3                |
| <i>Nitzschia angustata</i>         | X              |                             | 1                     | -                  | 1                      | 2        | 1         | 3                |
| <i>Nitzschia clausii</i>           |                | X                           | 3                     | 4                  | 2                      | 4        | 3         | 5                |

| Taxon                                                 | Pilato<br>Lake | Palazzo<br>Borghese<br>Lake | Moisture<br>aerophily | pH<br>requirements | Oxygen<br>requirements | Salinity | Saprobity | Trophic<br>state |
|-------------------------------------------------------|----------------|-----------------------------|-----------------------|--------------------|------------------------|----------|-----------|------------------|
| <i>Nitzschia dissipata</i>                            | X              |                             | 3                     | 4                  | 2                      | 2        | 2         | 4                |
| <i>Nitzschia inconspicua</i>                          | X              |                             | 3                     | 4                  | 3                      | 3        | 3         | 5                |
| <i>Nitzschia linearis</i>                             | X              |                             | 3                     | 4                  | 2                      | 2        | 2         | 4                |
| <i>Nitzschia pusilla</i>                              | X              |                             | 3                     | 3                  | 2                      | 2        | 2         | 7                |
| <i>Nitzschia subtilis</i>                             | X              |                             | -                     | 2                  | -                      | 2        | -         | -                |
| <i>Nitzschia sociabilis</i>                           | X              |                             | 4                     | 3                  | 2                      | 2        | 3         | 5                |
| <i>Nitzschia supralitorea</i>                         |                | X                           | 1                     | 3                  | 2                      | 2        | 2         | 5                |
| <i>Pinnularia borealis</i>                            | X              | X                           | 4                     | 3                  | 1                      | 2        | 2         | 2                |
| <i>Pinnularia grunowii</i>                            | X              | X                           | -                     | -                  | -                      | -        | -         | -                |
| <i>Pinnularia microstauron</i><br><i>var. angusta</i> | X              | X                           | -                     | -                  | -                      | -        | -         | -                |
| <i>Pinnularia obscura</i>                             |                | X                           | -                     | -                  | -                      | -        | -         | -                |
| <i>Pinnularia rupestris</i>                           |                | X                           | 3                     | 3                  | 1                      | 1        | -         | 1                |
| <i>Pinnularia schoenfelderi</i>                       | X              | X                           | 3                     | 3                  | 3                      | 2        | 2         | 1                |
| <i>Placoneis placentula</i>                           | X              | X                           | 1                     | 4                  | 2                      | 2        | 2         | 5                |
| <i>Planothidium</i><br><i>frequentissimum</i>         | X              |                             | -                     | 4                  | 3                      | 2        | 4         | 7                |
| <i>Planothidium joursacense</i>                       | X              |                             | -                     | 4                  | 2                      | 2        | 1         | 2                |
| <i>Planothidium lanceolatum</i>                       | X              |                             | 3                     | 4                  | 3                      | 2        | 3         | 5                |
| <i>Psammothidium daonense</i>                         | X              |                             | 1                     | 3                  | 1                      | 1        | 1         | 1                |
| <i>Pseudostaurosira robusta</i>                       | X              |                             | -                     | -                  | -                      | -        | -         | -                |
| <i>Reimeria sinuata</i>                               | X              |                             | 3                     | 3                  | 1                      | 2        | 2         | 3                |
| <i>Rhoicosphenia abbreviata</i>                       | X              |                             | 2                     | 4                  | 2                      | 2        | 2         | 5                |
| <i>Sellaphora atomoides</i>                           |                | X                           | -                     | -                  | -                      | -        | -         | -                |
| <i>Sellaphora pseudopupula</i>                        | X              | X                           | -                     | -                  | -                      | -        | -         | -                |
| <i>Sellaphora saugerresi</i>                          | X              |                             | 3                     | 3                  | 4                      | 2        | 4         | 5                |
| <i>Stauroneis gracilis</i>                            | X              |                             | -                     | -                  | -                      | -        | -         | -                |
| <i>Stauroneis reichardtii</i>                         |                | X                           | -                     | -                  | -                      | -        | -         | -                |
| <i>Staurosira construens</i>                          | X              |                             | 1                     | 4                  | 1                      | 2        | 2         | 4                |
| <i>Staurosira venter</i>                              | X              | X                           | 1                     | 4                  | 1                      | 2        | 2         | 4                |
| <i>Staurosirella lapponica</i>                        | X              |                             | 2                     | 4                  | -                      | 2        | -         | -                |
| <i>Tryblionella apiculata</i>                         |                | X                           | 2                     | 4                  | 3                      | 4        | 3         | 5                |
| <i>Ulnaria acus</i>                                   | X              | X                           | 2                     | 4                  | 2                      | 2        | 3         | 5                |
| <i>Ulnaria ulna</i>                                   | X              |                             | 2                     | 4                  | 3                      | 2        | 4         | 7                |
